# Supplementary material for: Safety Lapses Prior to Initiation of Hemodialysis for Acute Kidney Injury in Hospitalized Patients: A Patient Safety Initiative
Source: MDPI journal article supplement (doi:10.3390/jcm7100317), 2018-10-01
Supplement: s1 [file s1]

## Supplemental Figure S1

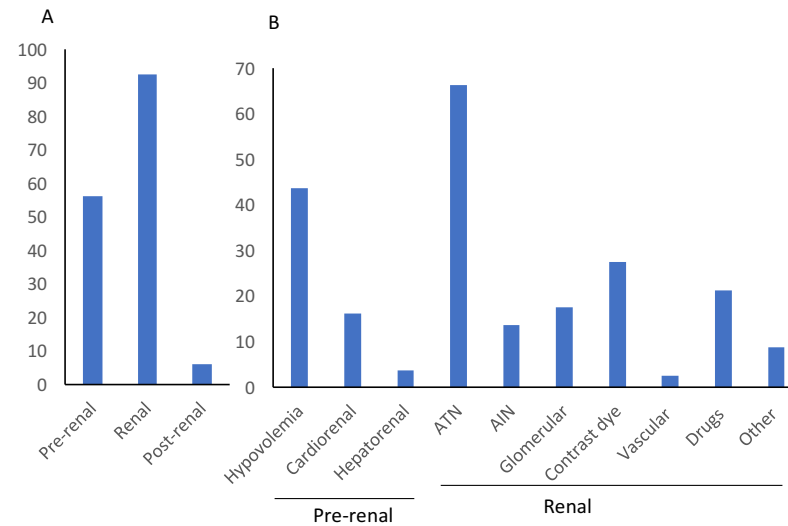

**S1.** Presumed AKI cause(s) represented as percentage within the study population. **(A)** Proportion of AKI within each major category. **(B)** Percent of pre-renal and renal etiologies of AKI. Pre-renal AKI includes mechanisms of reduced effective circulating volume. Renal AKI includes glomerular, tubulointerstitial, and vascular causes. It also includes nephrotoxins. Other causes of renal AKI (8.8%) include malignant mechanisms (tumour lysis, myeloma kidney), and thrombotic microangiopathy (TMA). The causes of AKI were gathered from admission note, Nephrology consult, progress notes, or a combination of these. There was more than one AKI cause provided for each patient.
